# Supplementary material
Source: ML conference proceedings conference paper supplement (https://openaccess.thecvf.com/content/WACV2022/html/Jeong_BiHPF_Bilateral_High-Pass_WACV_2022_paper.html)
Supplement: Supplementary file 7 [file Jeong_BiHPF_Bilateral_High-Pass_WACV_2022_supplemental.zip]

Archive with 13 entries (13 files):
- main.bib
- main.tex
- wacv.sty
- wacv_eso.sty
- eso-pic.sty
- ieee_fullname.bst
- README.md
- adversarialArchitecture.pdf
- frequencyAnalysis.pdf
- highFrequency.pdf
- lowFrequency.pdf
- teasor.pdf
- artifactAnalysis.pdf
