# Supplementary material
Source: ML conference proceedings conference paper supplement (https://openaccess.thecvf.com/content/WACV2022/html/Jeong_BiHPF_Bilateral_High-Pass_WACV_2022_paper.html)

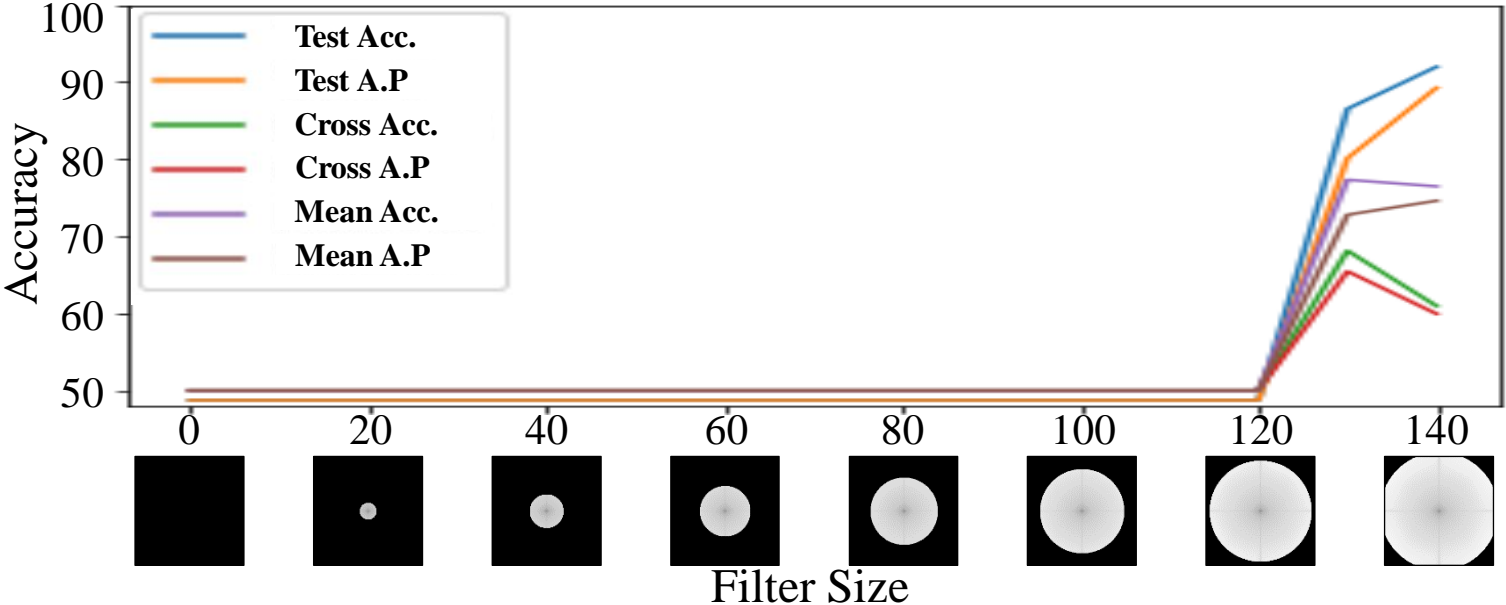

Supplement: Supplementary file 1 [file Jeong_BiHPF_Bilateral_High-Pass_WACV_2022_supplemental.zip]

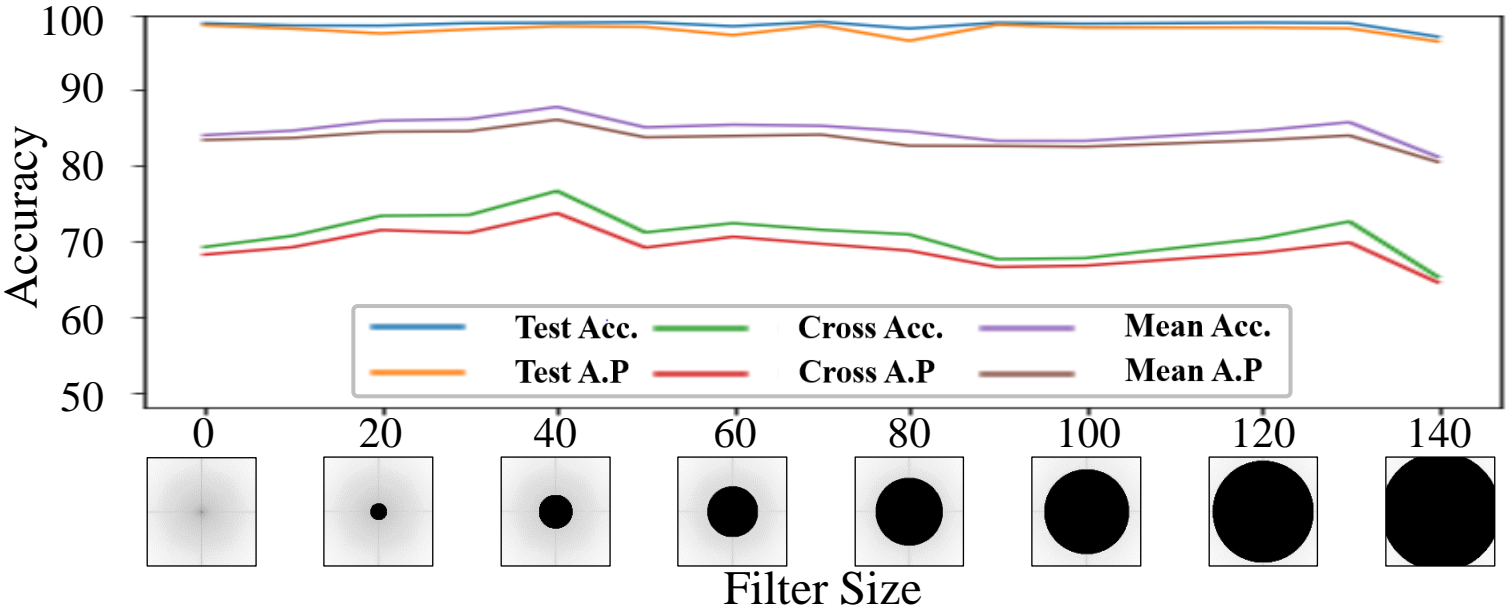

Supplement: Supplementary file 2 [file Jeong_BiHPF_Bilateral_High-Pass_WACV_2022_supplemental.zip]

# Cat

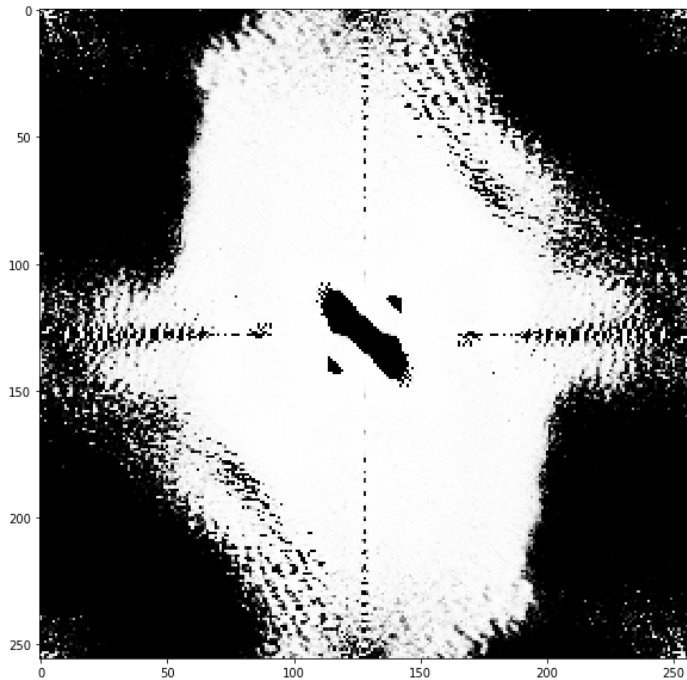

# Horse

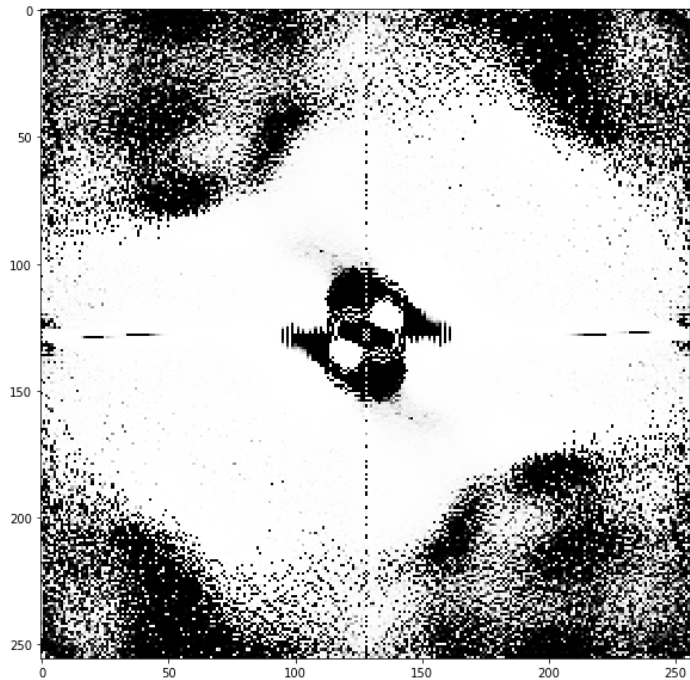

Supplement: Supplementary file 3 [file Jeong_BiHPF_Bilateral_High-Pass_WACV_2022_supplemental.zip]

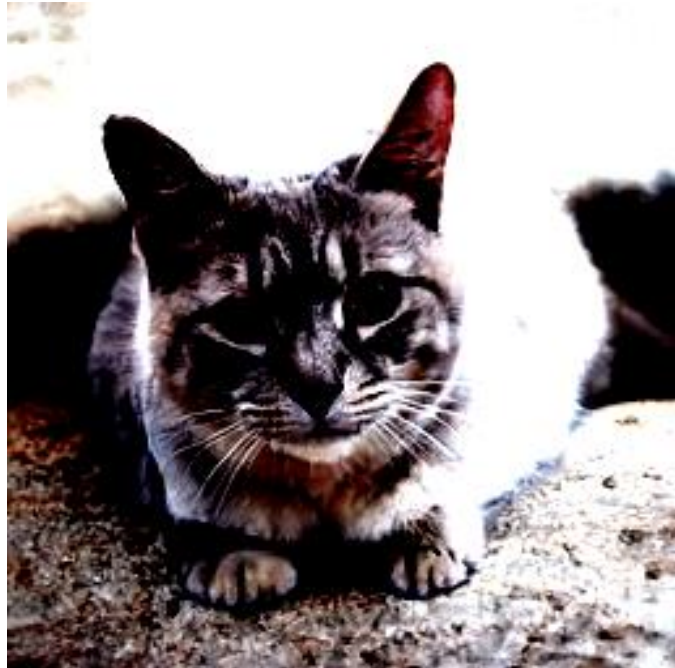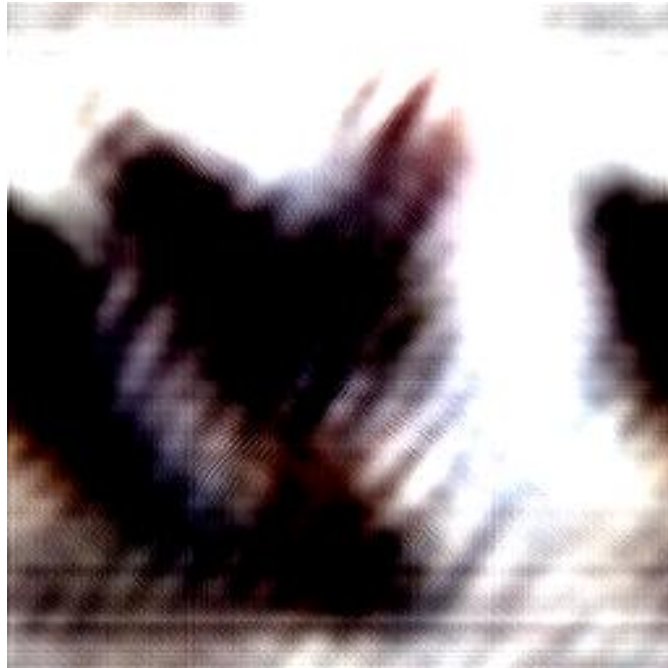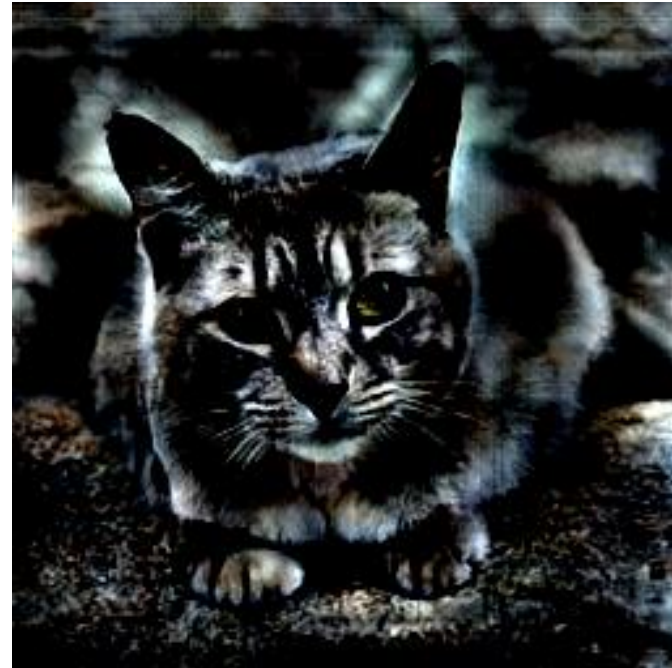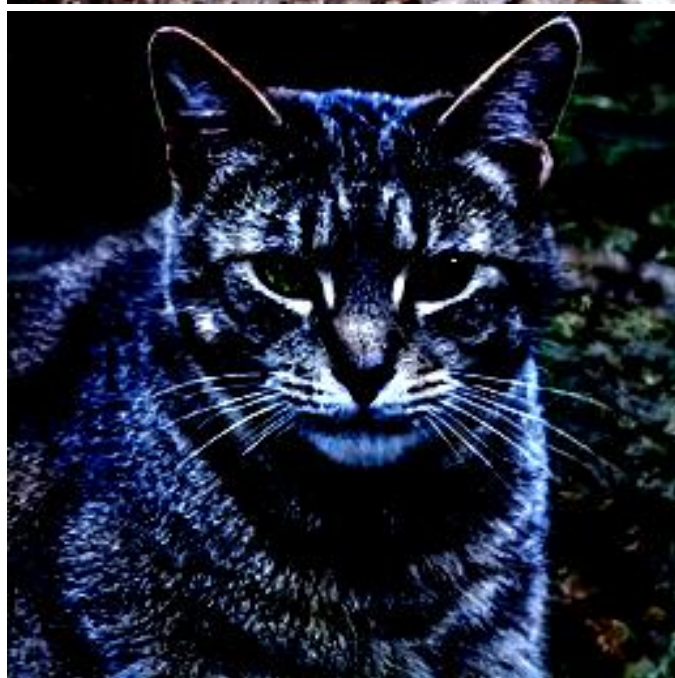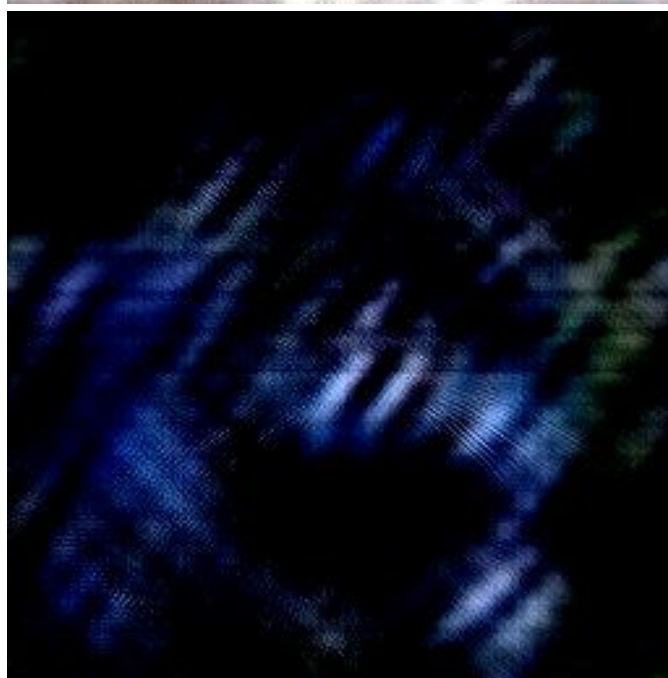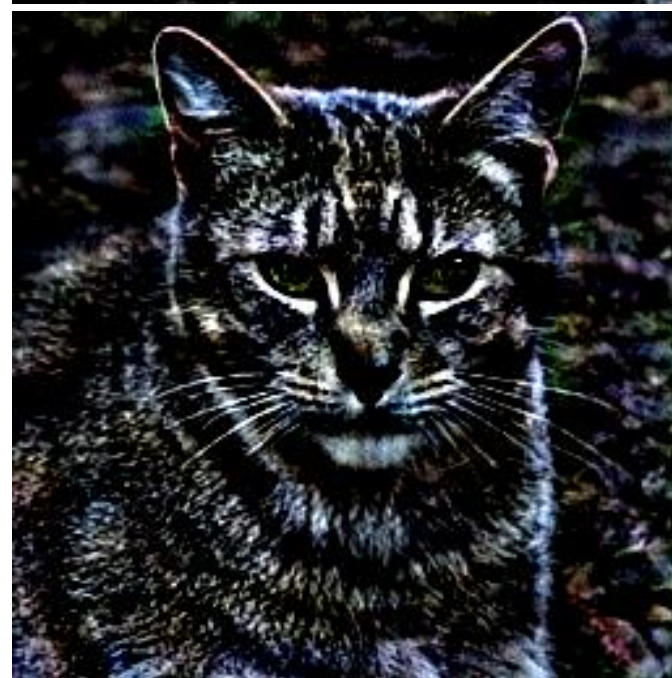

**Generated Images**

**Freq.-level Artifacts Generated w/o Artifacts**

Supplement: Supplementary file 4 [file Jeong_BiHPF_Bilateral_High-Pass_WACV_2022_supplemental.zip]

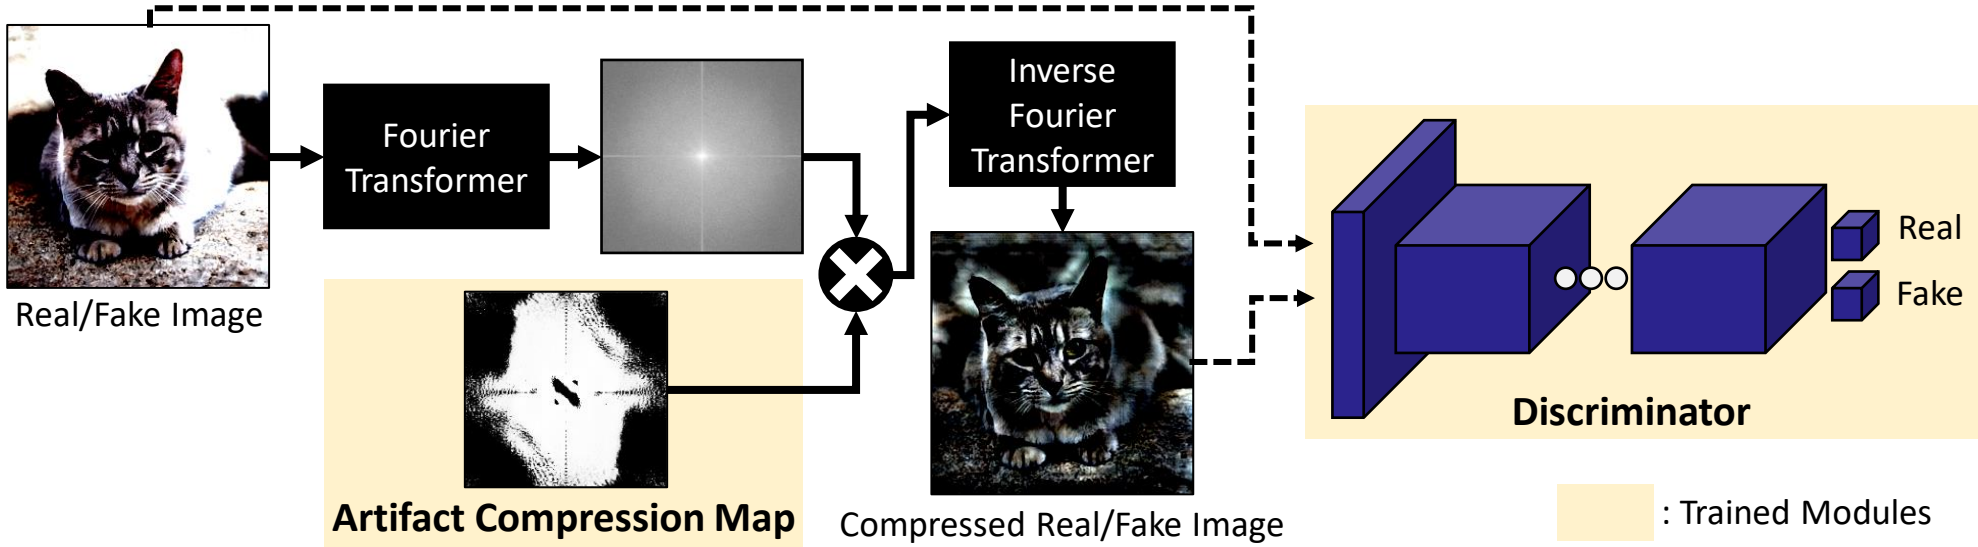

Supplement: Supplementary file 5 [file Jeong_BiHPF_Bilateral_High-Pass_WACV_2022_supplemental.zip]

# Cat

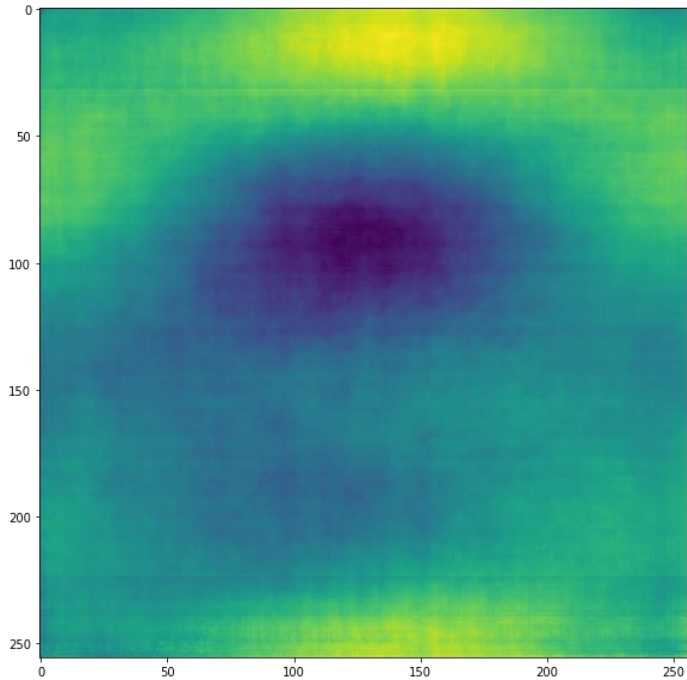

# Horse

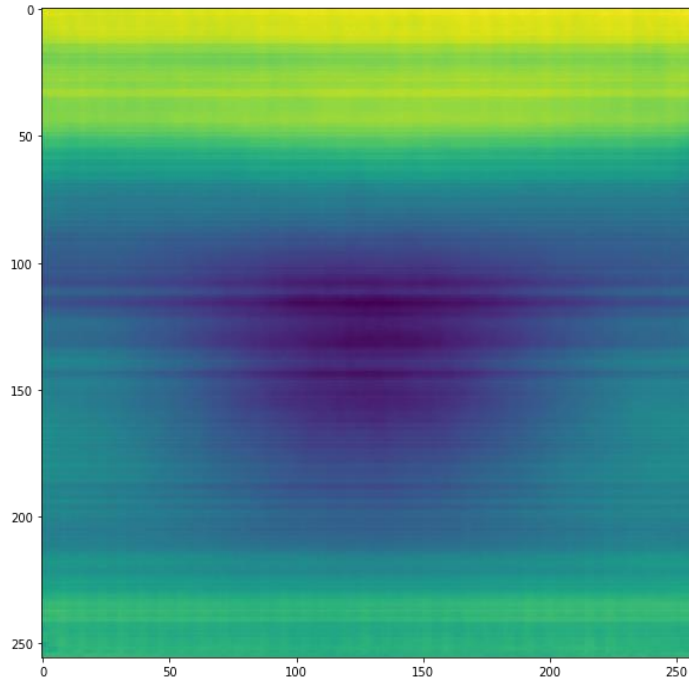

Supplement: Supplementary file 6 [file Jeong_BiHPF_Bilateral_High-Pass_WACV_2022_supplemental.zip]
